# Supplementary material for: Non-Volatile Component and Antioxidant Activity: A Comparative Analysis between Litsea cubeba Branches and Leaves
Source: MDPI journal article supplement (doi:10.3390/molecules29040788), 2024-02-08
Supplement: s1 [file s1]

# Non-Volatile Component and Antioxidant Activity: A Comparative Analysis between *Litsea Cubeba* Branches and Leaves

Wei Dai <sup>1</sup>, Boyi Li <sup>2</sup>, Yanli Xiong <sup>2</sup>, Liping Dai <sup>1</sup>, Yuan Tian <sup>3</sup>, Liangqian Zhang <sup>3</sup>, Qi Wang <sup>3,\*</sup> and Guoqiang Qian <sup>2,\*</sup>

<sup>1</sup> Teaching and Experimental Center, Guangdong Pharmaceutical University, Guangzhou 510006, China; dai\_gdpu\_2018@gdpu.edu.cn (W.D.)

<sup>2</sup> School of Chinese Medicine, Guangdong Pharmaceutical University, Guangzhou 510006, China

<sup>3</sup> Key Laboratory of Xinjiang Phytomedicine Resource and Utilization, Ministry of Education, School of Pharmacy, Shihezi University, Shihezi 832003, China

\* Correspondence: wq pha@shzu.edu.cn (Q.W.); tgqqian@gdpu.edu.cn (G.Q.)

**Figure S1.** UPLC-Q-Orbitrap HRMS chromatograms of branches *Litsea cubeba* in negative ion mode

**Figure S2.** UPLC-Q-Orbitrap HRMS chromatograms of branches *Litsea cubeba* in positive ion mode

**Figure S3.** UPLC-Q-Orbitrap HRMS chromatograms of leaves *Litsea cubeba* in negative ion mode

**Figure S4.** UPLC-Q-Orbitrap HRMS chromatograms of leaves *Litsea cubeba* in positive ion mode

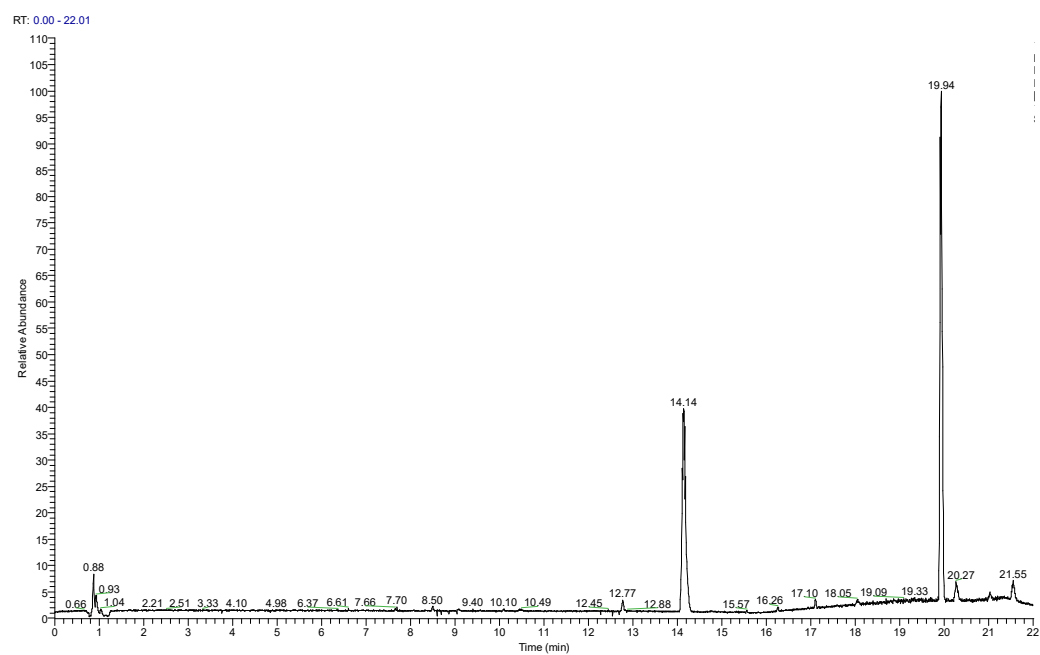

**Figure S1.** UPLC-Q-Orbitrap HRMS chromatograms of branches *Litsea cubeba* in negative ion mode

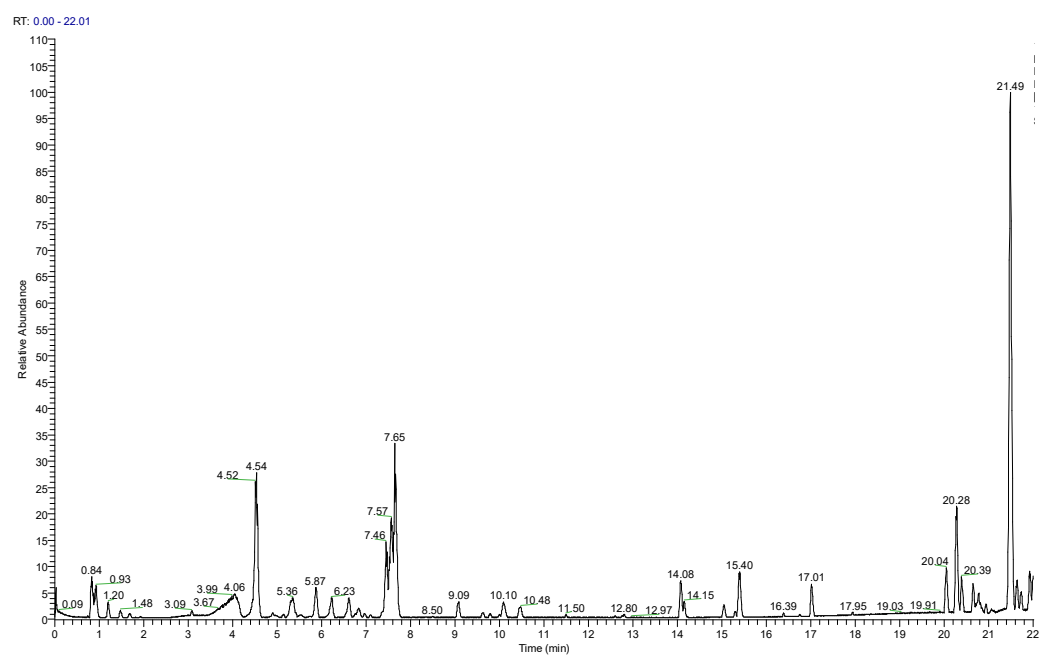

**Figure S2.** UPLC-Q-Orbitrap HRMS chromatograms of branches *Litsea cubeba* in positive ion mode

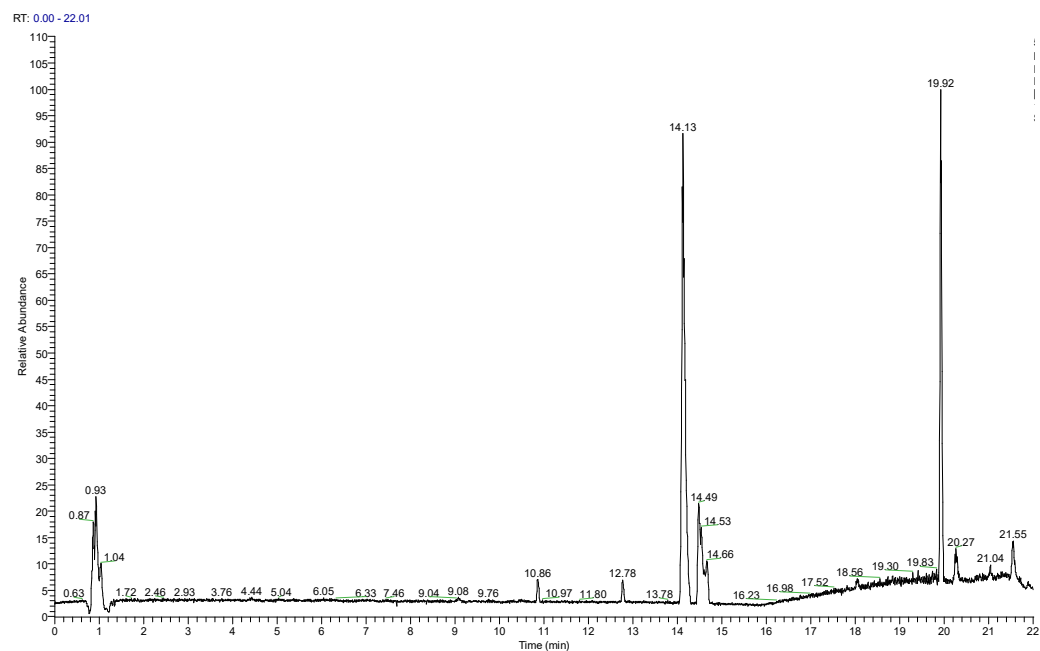

**Figure S3.** UPLC-Q-Orbitrap HRMS chromatograms of leaves *Litsea cubeba* in negative ion mode

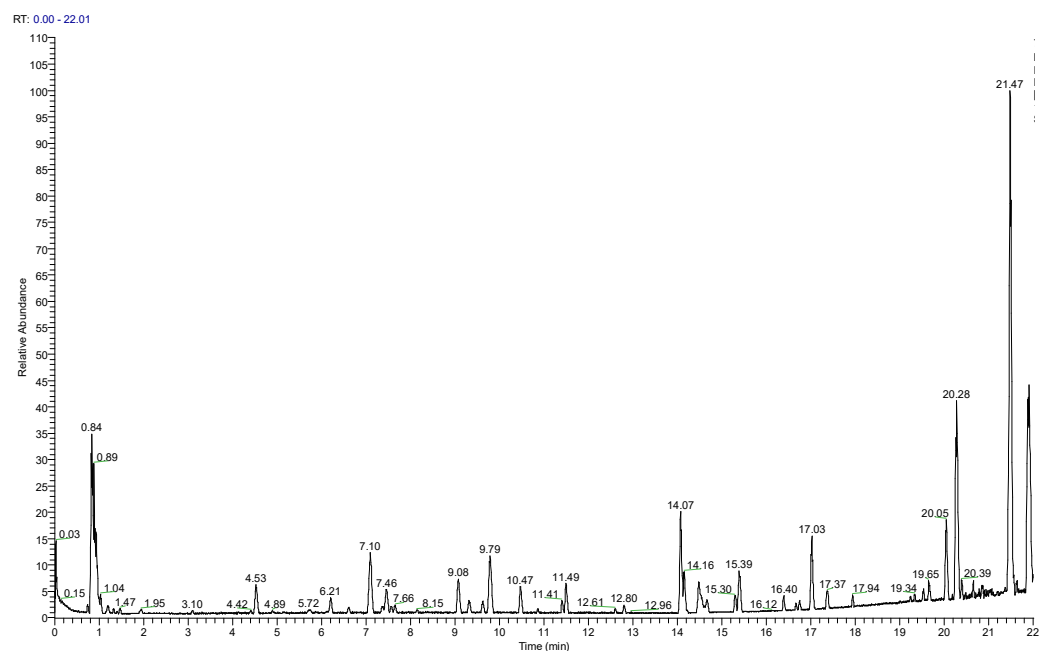

**Figure S4.** UPLC-Q-Orbitrap HRMS chromatograms of leaves *Litsea cubeba* in positive ion mode
